# Supplementary material for: Optimization of thermoelectric figure of merit in poly(p-phenylenediamine)/exfoliated graphene nanosheets composites
Source: Royal Society of Chemistry journal article supplement (doi:10.1039/c4ra06249c), 2014-09-05
Supplement: c4ra06249c1.pdf [file c4ra06249c1.pdf]

Electronic Supplementary Information for *RSC Advances* manuscript:

### Optimization of Thermoelectric Figure

of Merit in Poly(p-phenylenediamine)/ Exfoliated Graphene Nanosheets

### Composites via Situ Polymerization

Fangzhuan Liu, lingyu Wang, Qinjian Yin, Bo Jiang

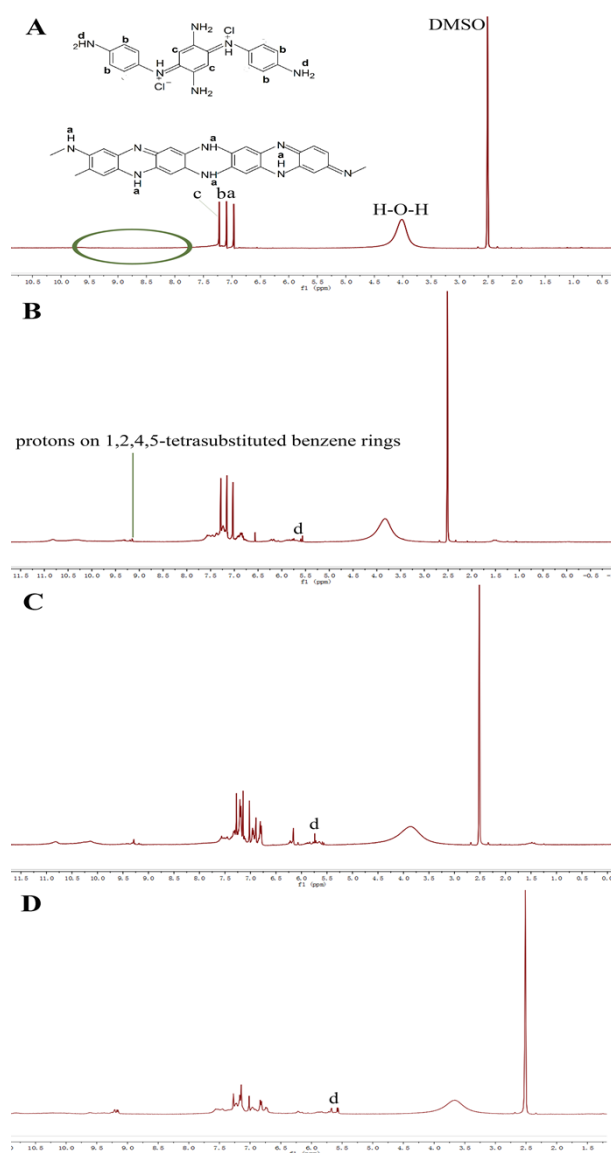

**Figure S1.**  $^1\text{H}$  NMR spectrums for the PpPD with different ratio of oxidation to monomer of 2(A), 1(B), 0.5(C) and 0.25(D) respectively in  $\text{CDCl}_3$ .

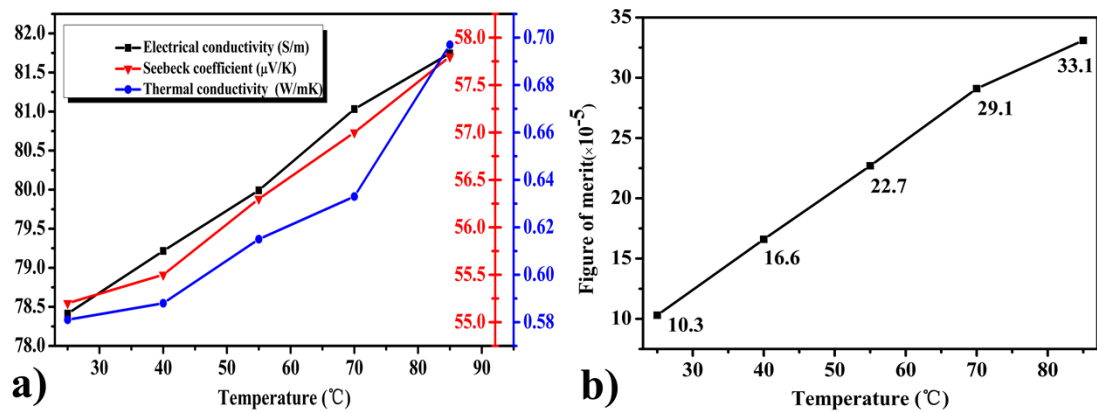

**Figure S2.** TE parameters a) and figure of merit of PpPD-20GNPs composite from 25 °C-85 °C b).
